# Supplementary material for: The anti-vascular endothelial growth factor receptor-1 monoclonal antibody D16F7 inhibits invasiveness of human glioblastoma and glioblastoma stem cells
Source: PubMed Central journal article supplement (PMC5553938; doi:10.1186/s13046-017-0577-2), 2017-08-10
Supplement: 13046_2017_577_MOESM4_ESM.pdf [file 13046_2017_577_MOESM4_ESM.pdf]

P3

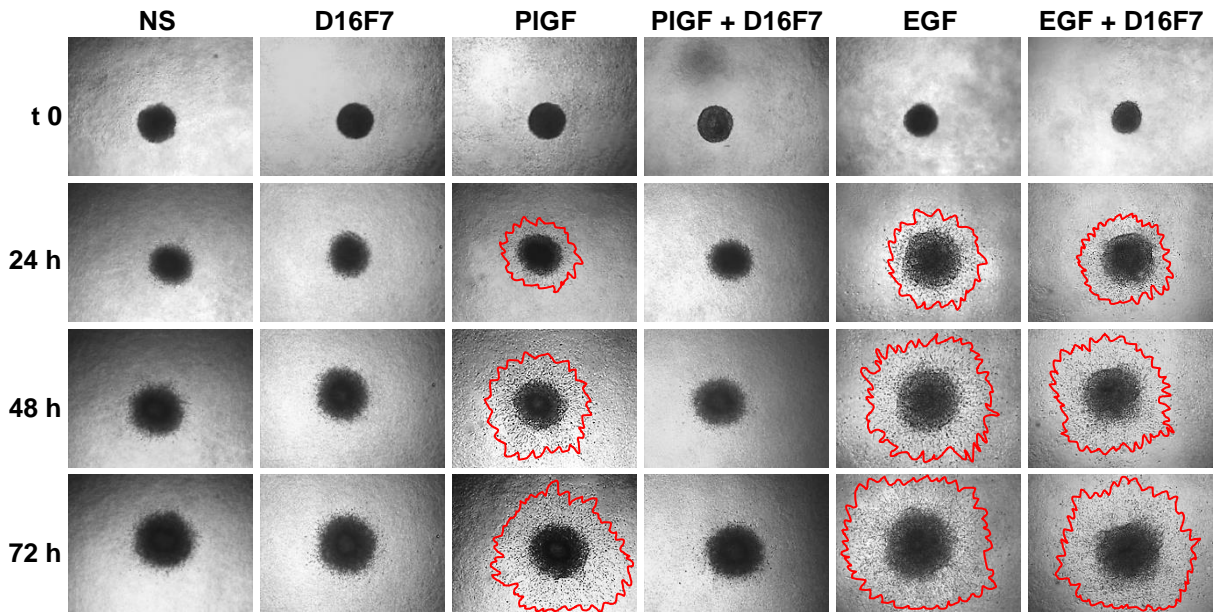

Figure S4
