# Supplementary material for: The anti-vascular endothelial growth factor receptor-1 monoclonal antibody D16F7 inhibits invasiveness of human glioblastoma and glioblastoma stem cells
Source: Springer Nature journal article supplement (doi:10.1186/s13046-017-0577-2), 2017-08-10
Supplement: MOESM2 [file 13942894]

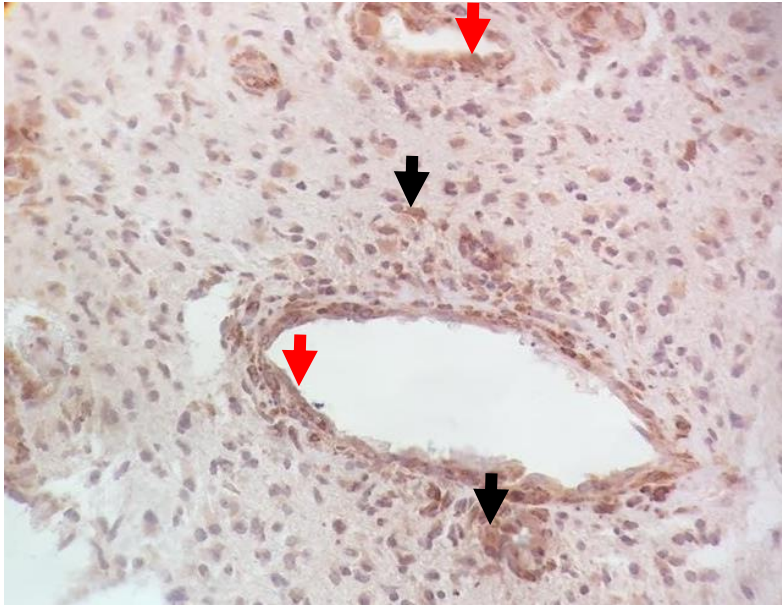

**Figure S2**
